# Supplementary material for: Long noncoding RNA SLC2A1‐AS1 regulates aerobic glycolysis and progression in hepatocellular carcinoma via inhibiting the STAT3/FOXM1/GLUT1 pathway
Source: PubMed Central journal article supplement (PMC7266282; doi:10.1002/1878-0261.12666), 2020-03-30
Supplement: MOL2-14-1381-s001.pdf [file MOL2-14-1381-s001.pdf]

Long noncoding RNA *SLC2A1-AS1* regulates aerobic glycolysis and progression in hepatocellular carcinoma via inhibiting the STAT3/FOXM1/GLUT1 pathway

Runze Shang<sup>#</sup>, Miao Wang<sup>#</sup>, Bin Dai<sup>#</sup>, Jianbing Du, Jianlin Wang, Zekun Liu, Shibin Qu, Xisheng Yang, Jingjing Liu, Congcong Xia, Lin Wang<sup>\*</sup>, Desheng Wang<sup>\*</sup>, Yu Li<sup>\*</sup>

Table of contents

|               |    |
|---------------|----|
| Fig. S1.....  | 2  |
| Fig. S2.....  | 3  |
| Fig. S3.....  | 4  |
| Fig. S4.....  | 5  |
| Fig. S5.....  | 6  |
| Table S1..... | 7  |
| Table S2..... | 8  |
| Table S3..... | 9  |
| Table S4..... | 10 |
| Table S5..... | 11 |

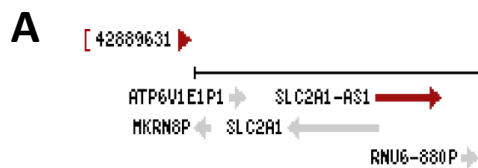

**B** Protein coding potential

| Metric                           | Raw result | Interpretation |
|----------------------------------|------------|----------------|
| PRIDE reprocessing 2.0           | 0          | non-coding [?] |
| Lee translation initiation sites | 0          | non-coding [?] |
| PhyloCSF score                   | -129.8888  | non-coding [?] |
| CPAT coding probability          | 1.39%      | non-coding [?] |
| Bazzini small ORFs               | 0          | non-coding [?] |

In stringent set: yes

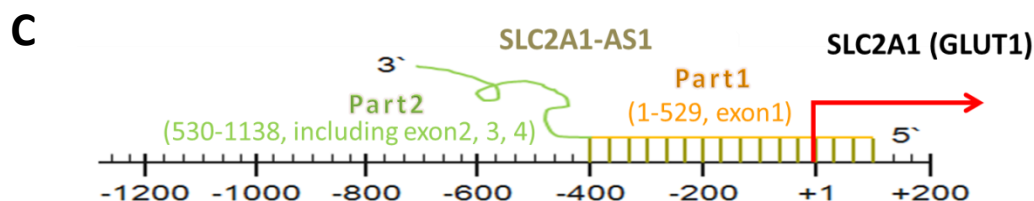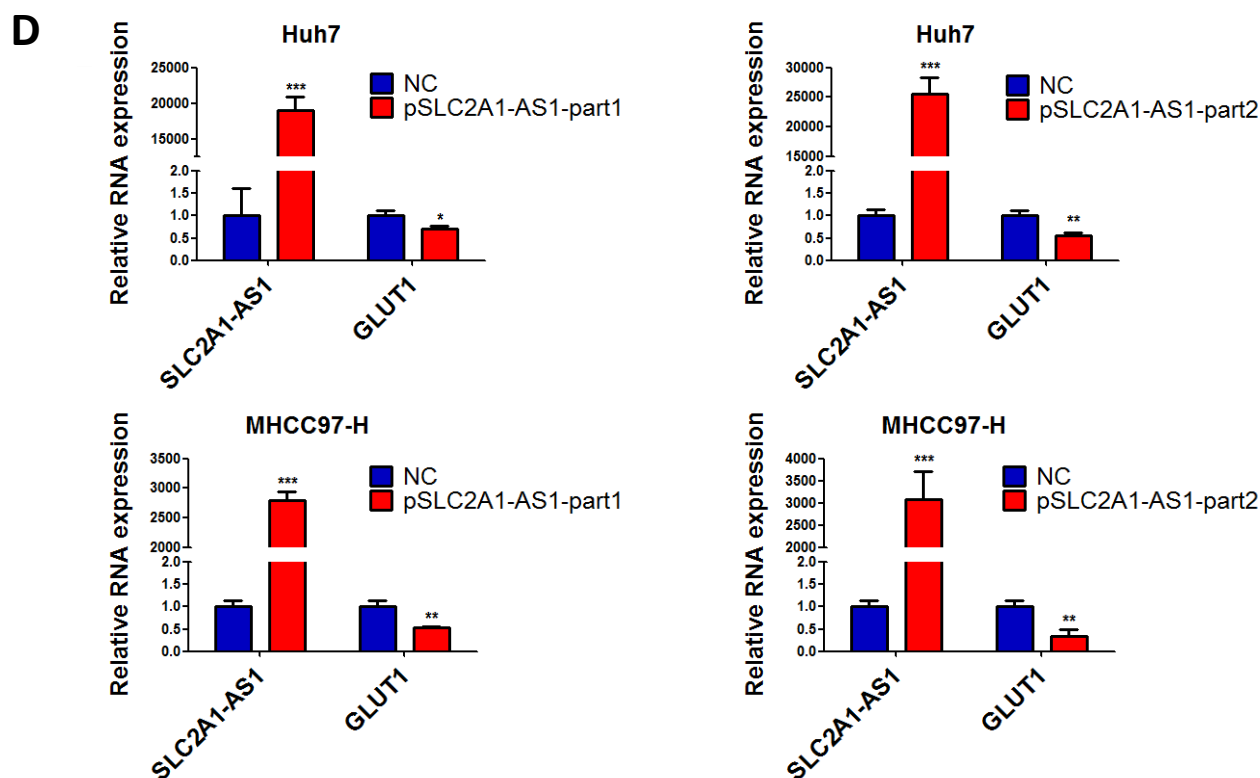

**Fig. S1. Characterization of the antisense lncRNA *SLC2A1-AS1*.** (A) Schematic diagram of the genomic locus of *SLC2A1-AS1* (<https://www.ncbi.nlm.nih.gov/>). (B) Prediction of the protein-coding potential of *SLC2A1-AS1* (<https://lncipedia.org/>). (C) Schematic representation of the potential overlap between *SLC2A1-AS1* and GLUT1. (D) qRT-PCR analysis was performed in HCC cells after transfection with one of the two parts of *SLC2A1-AS1*. Student's t-test was performed for statistical comparisons. \* $P < 0.05$ , \*\* $P < 0.01$ , \*\*\* $P < 0.001$ .

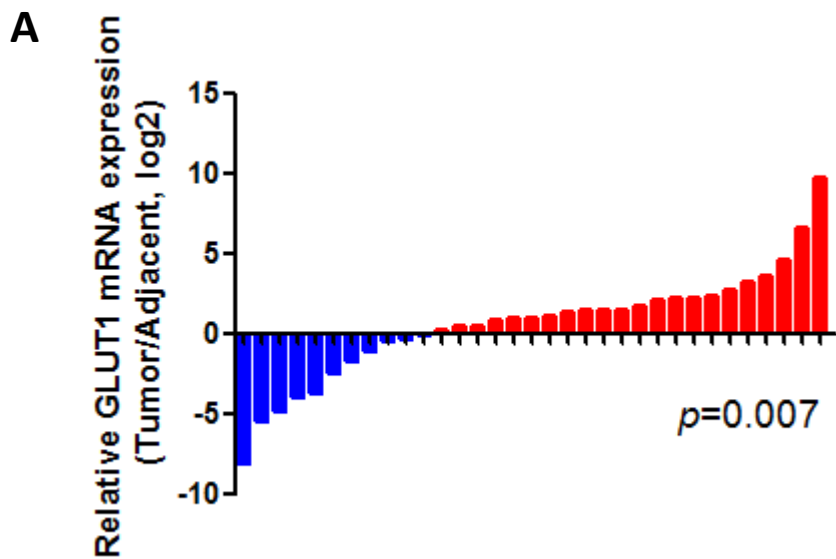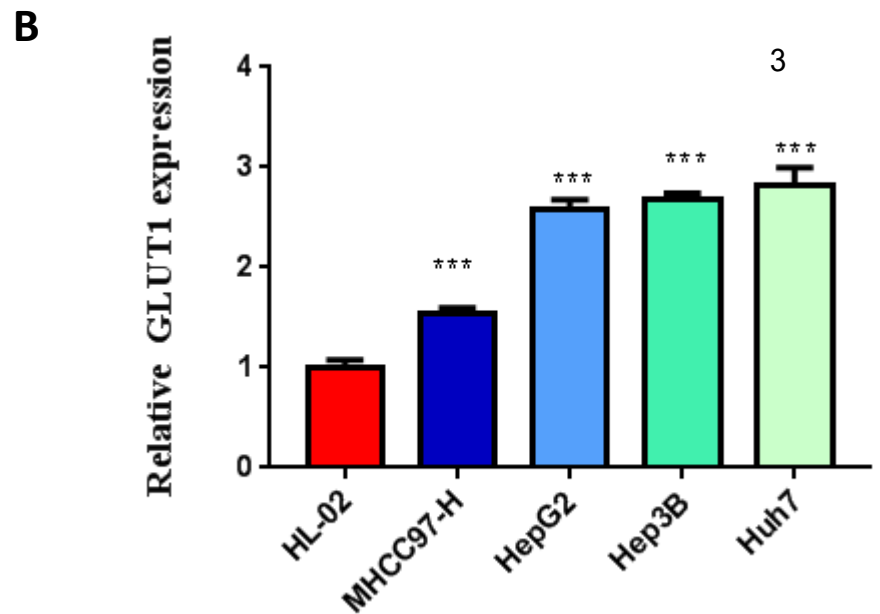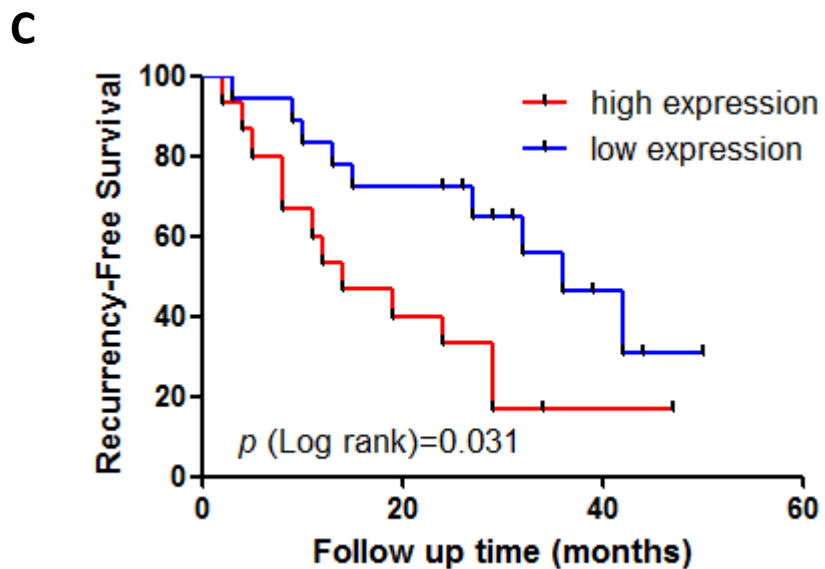

**Fig. S2. GLUT1 is upregulated in HCC and associated with tumour recurrence in HCC patients. (A)** qRT-PCR analysis of GLUT1 expression levels in 33 HCC tissues and paired adjacent non-tumour tissues. **(B)** Relative expression of GLUT1 in normal liver cell line and HCC cell lines according to qRT-PCR analysis. **(C)** Kaplan-Meier curve for recurrence-free survival based on GLUT1 mRNA expression level. Expression of GLUT1 in HCC samples was analysed with Wilcoxon signed-rank test; comparisons of the relative GLUT1 levels between the groups were analysed with ANOVA followed by post-hoc correction; Kaplan-Meier survival analysis was analysed with log-rank test; \*\*\* $p < 0.001$ .

A

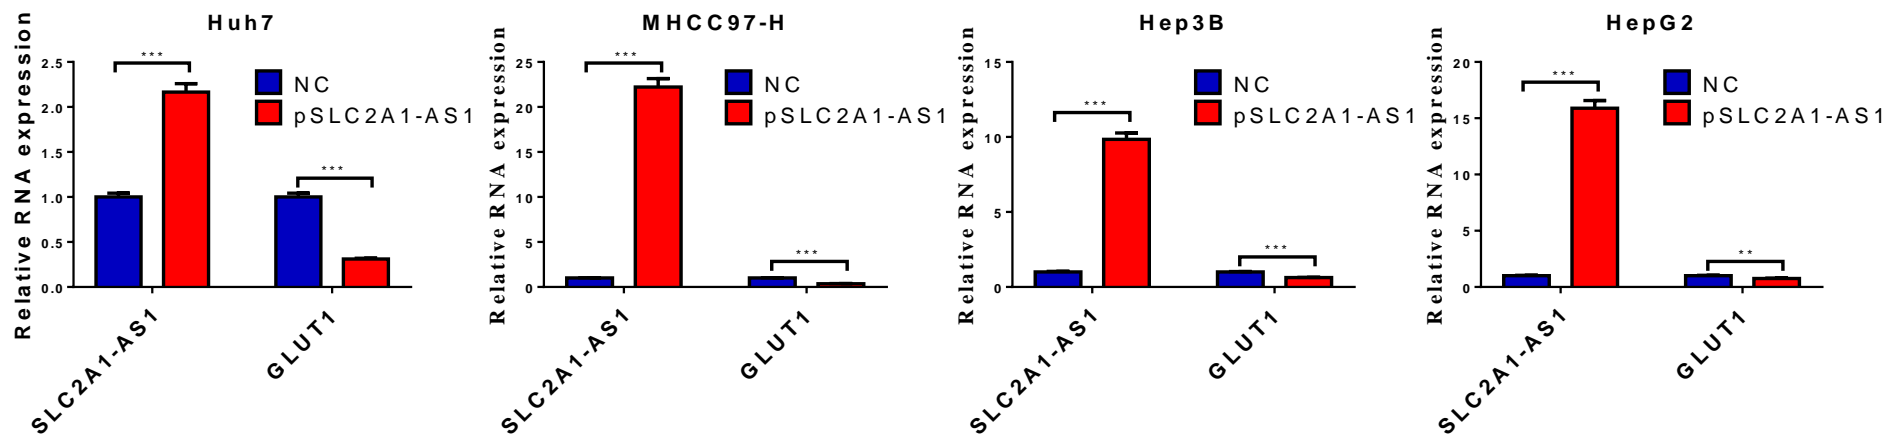

B

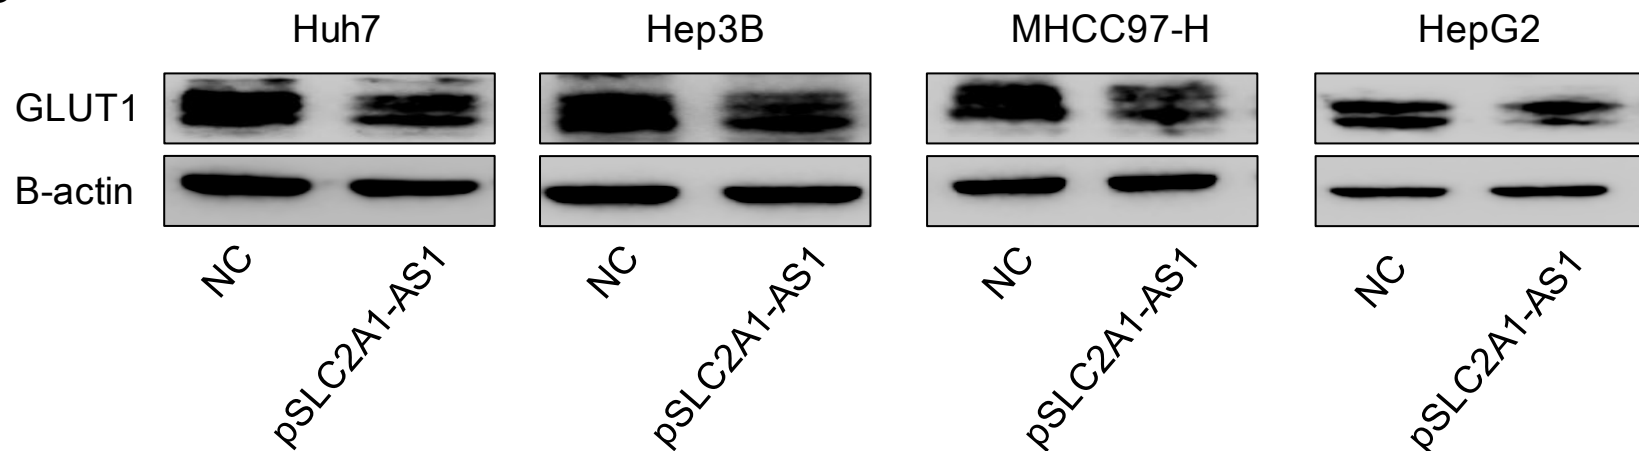

**Fig. S3. *SLC2A1-AS1* inhibits GLUT1 expression.** Overexpression of *SLC2A1-AS1* by transfecting 0.5  $\mu$ g *SLC2A1-AS1* plasmids reduced both the mRNA (A) and protein (B) level of GLUT1 in HCC cell lines. Student's t-test was performed for statistical comparisons. \*\* $P < 0.01$ , \*\*\* $P < 0.001$ .

**A**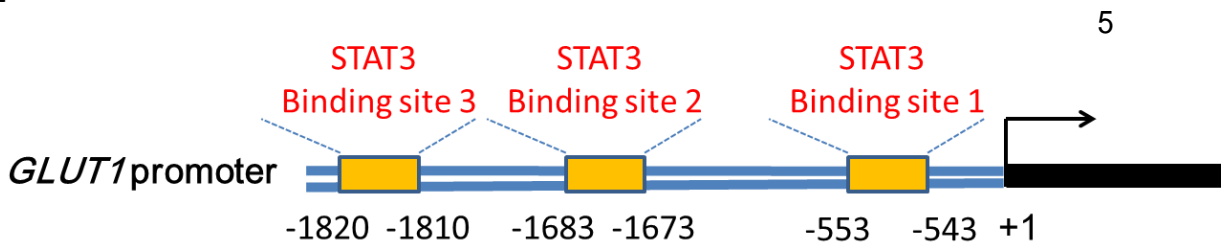**B**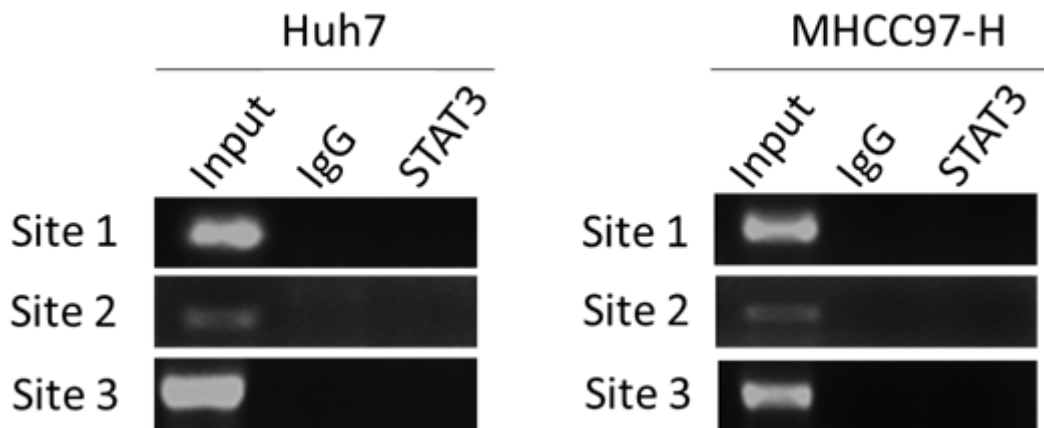

**Fig. S4. STAT3 cannot bind to the GLUT1 promoter in HCC cells. (A)** Schematic diagram of the putative STAT3 binding sites in the GLUT1 promoter. **(B)** ChIP analysis of the GLUT1 promoter using antibodies against STAT3 or IgG in Huh7 and MHCC97-H cells.

**A**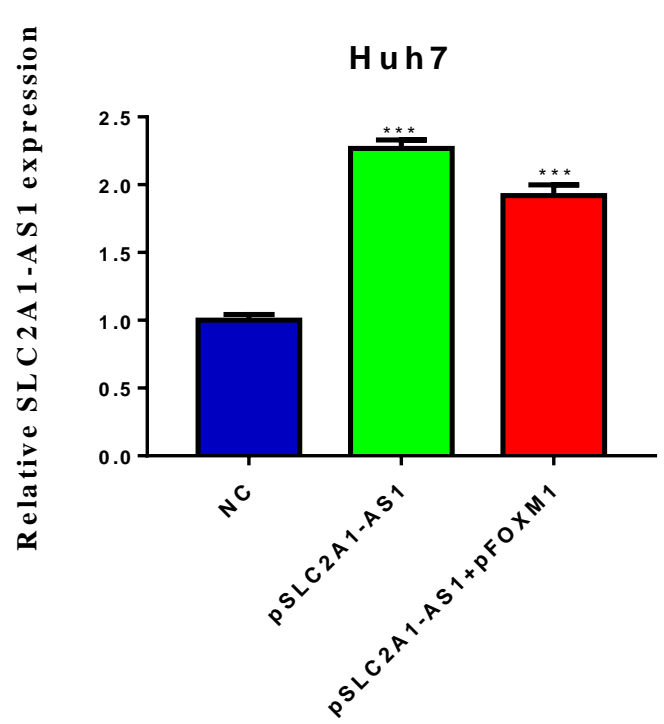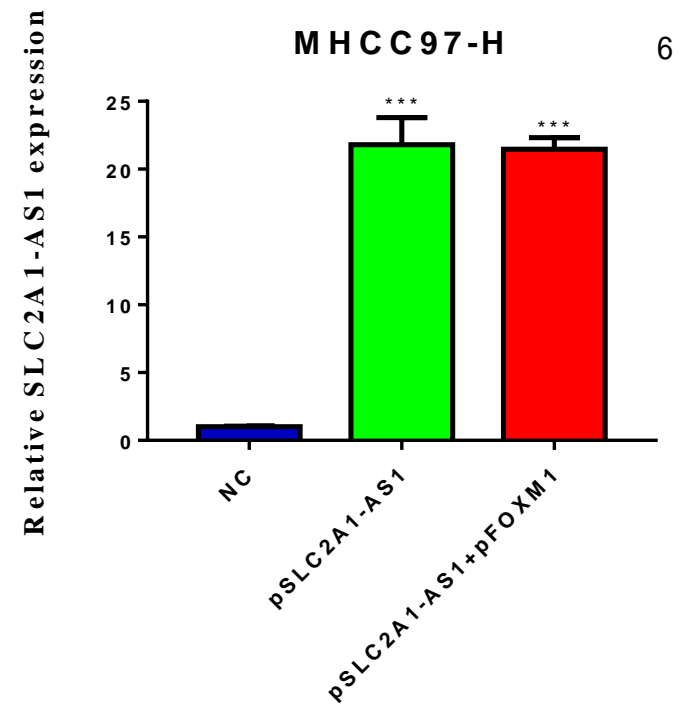

6

**B**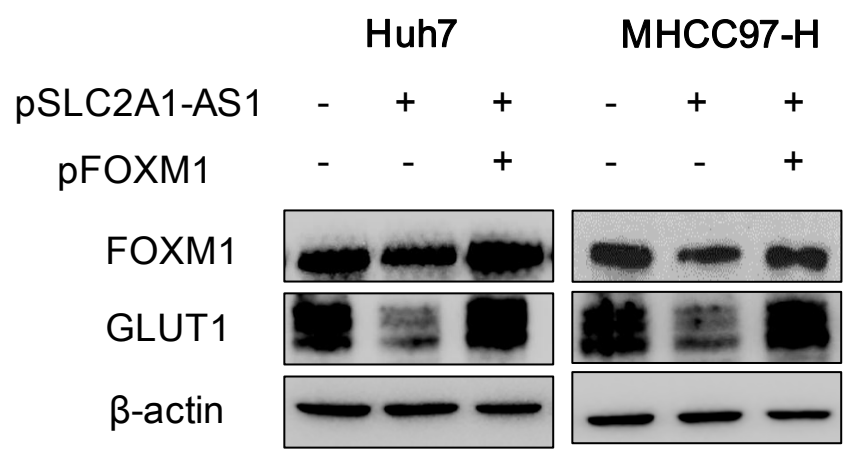

**Fig. S5. FOXM1 is required for *SLC2A1-AS1*-mediated GLUT1 downregulation.** HCC cells were transfected with control plasmids, *SLC2A1-AS1* overexpression plasmids or co-transfected with *SLC2A1-AS1* and FOXM1 overexpression plasmids, then the relative *SLC2A1-AS1* expression was assessed (A). (B) Relative expression of FOXM1 and GLUT1 was determined by western blot assays in Huh7 and MHCC97-H cells after transfection. ANOVA followed by post-hoc correction was performed to measure significance. \*\*\*P<0.001

**Table S1. Primers used in qRT-PCR assays.**

| <b>Primer</b>    | <b>Primer Sequence (5'-3')</b> |
|------------------|--------------------------------|
| SLC2A1-AS1-F     | CTAAGATGAGAGGAGCTGGTAGG        |
| SLC2A1-AS1-R     | CAGAAGGAGTTTGCGTGGTT           |
| GLUT1-F          | GGCCAAGAGTGTGCTAAAGAA          |
| GLUT1-R          | ACAGCGTTGATGCCAGACAG           |
| STAT3-F          | GGGAGAGAGTTACAGGTTGGACAT       |
| STAT3-R          | AGACGCCATTACAAGTGCCA           |
| FOXM1-F          | GGGCGCACGGCGGAAGATGAA          |
| FOXM1-R          | CCACTCTTCCAAGGGAGGGCTC         |
| $\beta$ -actin-F | TAGTTGCGTTACACCCTTTCTTG        |
| $\beta$ -actin-R | TCACCTTCACCGTTCCAGTTT          |

**Table S2. List of primary Antibodies.**

| <b>Antibody</b> | <b>Catalog number</b> | <b>Company</b>               | <b>Species</b> | <b>Dilution</b> |
|-----------------|-----------------------|------------------------------|----------------|-----------------|
| GLUT1           | PA5-16793             | Thermo Fisher<br>Scientific  | Rabbit         | 1:1000          |
| FOXM1           | 13147-1-AP            | Proteintech                  | Rabbit         | 1:1000          |
| STAT3           | 9319                  | Cell Signaling<br>Technology | Mouse          | 1:1000          |
| $\beta$ -actin  | 3700                  | Cell Signaling<br>Technology | Mouse          | 1:3000          |



**Table S3. PCR primer sequences of DNA fragments targeted FOXM1 and GLUT1 promoters.**

| <b>Primer</b>           | <b>Primer Sequence (5'-3')</b> |
|-------------------------|--------------------------------|
| GLUT1-binding site 1-F  | AAGGAGGATGAGGTGGTG             |
| GLUT1-binding site 1-R  | GAGTATGGAGCCCTGAAAC            |
| GLUT1-binding site 2-F  | AGTCAGTTAGCCTGCCTTTC           |
| GLUT1-binding site 2-R  | TCTTGCCCAGGGATTGAC             |
| GLUT1-binding site 3-F  | GGCTTGGCTCACAAACGG             |
| GLUT1-binding site 3-R  | GAGTAGCGGGTGGAAAGC             |
| FOXM1- binding site 1-F | CACCATCAAGCCCTGTCA             |
| FOXM1- binding site 1-R | AGAGCCTTAGCCATACCG             |
| FOXM1- binding site 2-F | TGCCATTGTATCTTCAGGG            |
| FOXM1- binding site 2-R | GGCACCATGAACCCTACCT            |
| FOXM1- binding site 3-F | TGCCATTGTATCTTCAGGG            |
| FOXM1- binding site 3-R | CTTTGAGGGCTGCGTATT             |

**Table S4. Univariate and multivariate Cox regression analyses of recurrence-free survival in 33 patients with HCC.**

| Clinicopathological characteristics            | Univariate analysis |                |          | Multivariate analysis |                |          |
|------------------------------------------------|---------------------|----------------|----------|-----------------------|----------------|----------|
|                                                | HR                  | 95 % <i>CI</i> | <i>P</i> | HR                    | 95 % <i>CI</i> | <i>P</i> |
| Gender (female versus male)                    | 0.276               | 0.063-1.204    | 0.087    |                       |                |          |
| Age (>50 versus ≤50)                           | 1.104               | 0.464-2.630    | 0.823    |                       |                |          |
| AFP (>20 versus ≤20)                           | 2.001               | 0.803-4.985    | 0.748    |                       |                |          |
| Tumor size (≥5 versus <5cm)                    | 1.665               | 0.703-3.944    | 0.247    |                       |                |          |
| Tumor nodules (multiple versus single)         | 1.323               | 0.388-4.510    | 0.655    |                       |                |          |
| Tumor differentiation (low versus high)        | 1.134               | 0.378-3.406    | 0.822    |                       |                |          |
| Liver cirrhosis (with versus without)          | 1.673               | 0.695-4.028    | 0.251    |                       |                |          |
| Microvascular invasion (present versus absent) | 2.994               | 1.092-8.206    | 0.033*   | 5.183                 | 1.703-15.775   | 0.004*   |
| SLC2A1-AS1 (high versus low)                   | 0.359               | 0.134-0.960    | 0.033*   | 0.195                 | 0.064-0.596    | 0.004*   |
| GLUT1 (high versus low)                        | 2.543               | 1.055-6.128    | 0.038*   | 1.705                 | 0.700-4.154    | 0.240    |

Statistical analyses were performed by the Cox test analysis; HR hazard ratio, *CI* confidence interval, AFP alphafetoprotein; \**P*<0.05 was considered significant.

**Table S5. Summary of proteins interacting with SLC2A1-AS1 uniquely by mass spectrometric analysis.**

| <b>Protein name</b> | <b>Coverage(%)</b> | <b>Binding Length</b> | <b>Mass</b> |
|---------------------|--------------------|-----------------------|-------------|
| EF1A3               | 32.9               | 462                   | 50140.6     |
| TBA1B               | 33.26              | 451                   | 50151.2     |
| H14                 | 11.42              | 219                   | 21865       |
| ALDR                | 10.76              | 316                   | 35853.1     |
| MARCS               | 10.24              | 332                   | 31554.2     |
| TXND5               | 6.019              | 432                   | 47628.5     |
| ZYX                 | 5.42               | 572                   | 61276.9     |
| KPRP                | 3.8                | 579                   | 64135.2     |
| RS11                | 13.29              | 158                   | 18430.6     |
| MOT4                | 5.591              | 465                   | 49468.9     |
| RL10L               | 8.411              | 214                   | 24518.6     |
| BASI                | 5.974              | 385                   | 42200.1     |
| UGPA                | 5.709              | 508                   | 56939.8     |
| RS12                | 8.333              | 132                   | 14514.8     |
| RRBP1               | 1.844              | 1410                  | 152471.8    |
| SYNC                | 1.46               | 548                   | 62942.4     |
| PSB6                | 4.603              | 239                   | 25357.5     |
| 1433B               | 8.943              | 246                   | 28082.2     |
| SET                 | 3.448              | 302                   | 34882.1     |
| MCM2                | 1.217              | 904                   | 101895.2    |
| MAGB2               | 5.016              | 319                   | 35276.8     |
| ACTG                | 66.4               | 375                   | 41792.5     |
| K2C6A               | 34.04              | 564                   | 60044.5     |
| DYH1                | 0.3695             | 4330                  | 493948.4    |
| COPG2               | 1.952              | 871                   | 97621.3     |
| IF2GL               | 2.331              | 472                   | 51228.2     |
| CPT1A               | 1.811              | 773                   | 88366.9     |
| SPB4                | 3.077              | 390                   | 44853.7     |
| CAZA1               | 5.245              | 286                   | 32922.5     |
| RL29                | 9.434              | 159                   | 17751.9     |
| ETFA                | 5.405              | 333                   | 35079.2     |
| AATM                | 1.86               | 430                   | 47517.3     |
| TRY6                | 8.097              | 247                   | 26557.9     |
| F10A5               | 3.523              | 369                   | 41377.4     |
| RL8                 | 4.28               | 257                   | 28024.5     |
| QCR1                | 2.5                | 480                   | 52645.3     |
| S10A7               | 10.89              | 101                   | 11470.9     |
| EMD                 | 4.724              | 254                   | 28993.5     |
| CALL5               | 5.479              | 146                   | 15892.4     |
| PDIA4               | 1.705              | 645                   | 72931.9     |
| AMPL                | 2.312              | 519                   | 56165.8     |
| DSRAD               | 0.8972             | 1226                  | 136065.3    |
| IF4B                | 2.128              | 611                   | 69150.4     |
| EIF3C               | 0.8762             | 913                   | 105343      |
| RASEF               | 1.486              | 740                   | 82878.3     |
| SF01                | 2.347              | 639                   | 68329.5     |
| AHSA1               | 3.254              | 338                   | 38274.1     |
| PFKAP               | 1.02               | 784                   | 85595.4     |
| PIMT                | 3.965              | 227                   | 24636.2     |

|       |        |      |          |
|-------|--------|------|----------|
| COPD  | 2.153  | 511  | 57209.9  |
| TLN2  | 0.4327 | 2542 | 271610.4 |
| RL15  | 7.843  | 204  | 24145.9  |
| S61A1 | 2.311  | 476  | 52264.2  |
| STAT3 | 1.429  | 770  | 88067.2  |
| DDX3X | 1.208  | 662  | 73242.8  |
| GBB1  | 3.529  | 340  | 37376.6  |

---
